# Supplementary material
Source: PubMed Central journal article supplement (PMC6754306)
Supplement: NIHMS1535977-supplement-2.pdf [file NIHMS1535977-supplement-2.pdf]

Supplementary Table 1: GSEA full report for RNA-seq profiling of *Ptpn2*-deleted and control Slamf6+ and Tim-3+ cells 8 days post LCMV Clone 13 infection

**Tim3+ Control vs Ptpn2 KO Up**

| NAME       | GS<br> follo | GS DETAILS  | SIZE | ES  | NES        | NOM p-val | FDR q-val  | FWER p-val | RANK AT M/ | LEADING EDGE                          |
|------------|--------------|-------------|------|-----|------------|-----------|------------|------------|------------|---------------------------------------|
| LCMVSLAMF  | LCMVSLAMF    | Details ... |      | 389 | 0.28616044 | 6.544572  | 0          | 0          | 0          | 5928 tags=56%, list=28%, signal=76%   |
| TILSLAMF6  | TILSLAMF6    | Details ... |      | 50  | 0.56955063 | 4.680985  | 0          | 0          | 0          | 4916 tags=80%, list=23%, signal=104%  |
| LCMVSLAMF  | LCMVSLAMF    | Details ... |      | 50  | 0.4463847  | 3.713713  | 0          | 0          | 0          | 4977 tags=68%, list=23%, signal=89%   |
| HALLMARK_I | HALLMARK_I   | Details ... |      | 91  | 0.29304585 | 3.2852528 | 0          | 0          | 0          | 5931 tags=57%, list=28%, signal=79%   |
| HALLMARK_I | HALLMARK_I   | Details ... |      | 190 | 0.1957981  | 3.1659865 | 0          | 0          | 0          | 5931 tags=47%, list=28%, signal=65%   |
| HALLMARK_I | HALLMARK_I   | Details ... |      | 194 | 0.17738196 | 2.8173385 | 0          | 0          | 0          | 5893 tags=45%, list=28%, signal=62%   |
| LCMVSLAMF  | LCMVSLAMF    | Details ... |      | 49  | 0.3372496  | 2.7917113 | 0          | 0          | 0          | 5849 tags=61%, list=28%, signal=84%   |
| HALLMARK_I | HALLMARK_I   | Details ... |      | 186 | 0.17416011 | 2.7801452 | 0          | 0          | 0          | 5917 tags=45%, list=28%, signal=62%   |
| HALLMARK_I | HALLMARK_I   | Details ... |      | 159 | 0.15457375 | 2.3492877 | 0          | 0.00103048 | 0.013      | 5550 tags=42%, list=26%, signal=56%   |
| HALLMARK_I | HALLMARK_I   | Details ... |      | 185 | 0.13692194 | 2.149696  | 0          | 0.00413276 | 0.057      | 5949 tags=42%, list=28%, signal=57%   |
| HALLMARK_I | HALLMARK_I   | Details ... |      | 193 | 0.1251808  | 2.0251818 | 0.01276596 | 0.00821173 | 0.12       | 1984 tags=22%, list=9%, signal=24%    |
| HALLMARK_I | HALLMARK_I   | Details ... |      | 140 | 0.12754337 | 1.7799437 | 0.01757813 | 0.03078465 | 0.411      | 5948 tags=41%, list=28%, signal=56%   |
| HALLMARK_I | HALLMARK_I   | Details ... |      | 193 | 0.10830075 | 1.7202691 | 0.02217742 | 0.03831887 | 0.503      | 5856 tags=38%, list=28%, signal=52%   |
| HALLMARK_I | HALLMARK_I   | Details ... |      | 47  | 0.21191955 | 1.7049017 | 0.03112841 | 0.0382978  | 0.527      | 5443 tags=47%, list=26%, signal=63%   |
| HALLMARK_I | HALLMARK_I   | Details ... |      | 98  | 0.14783475 | 1.7018884 | 0.02816901 | 0.03641352 | 0.533      | 4670 tags=37%, list=22%, signal=47%   |
| HALLMARK_I | HALLMARK_I   | Details ... |      | 53  | 0.19830494 | 1.6875923 | 0.03149606 | 0.03685653 | 0.562      | 5809 tags=47%, list=27%, signal=65%   |
| HALLMARK_I | HALLMARK_I   | Details ... |      | 43  | 0.20198613 | 1.5739435 | 0.03933748 | 0.05864735 | 0.746      | 13976 tags=86%, list=66%, signal=252% |
| HALLMARK_I | HALLMARK_I   | Details ... |      | 198 | 0.09224364 | 1.5047085 | 0.06504065 | 0.075227   | 0.846      | 8667 tags=50%, list=41%, signal=84%   |
| HALLMARK_I | HALLMARK_I   | Details ... |      | 34  | 0.16661344 | 1.153782  | 0.25298804 | 0.28348705 | 1          | 12692 tags=76%, list=60%, signal=190% |
| HALLMARK_I | HALLMARK_I   | Details ... |      | 32  | 0.1423903  | 0.9684908 | 0.47058824 | 0.47619098 | 1          | 4275 tags=34%, list=20%, signal=43%   |

**Tim3+ Control vs Ptpn2 KO Down**

| NAME       | GS<br> follo          | GS DETAILS  | SIZE | ES  | NES        | NOM p-val  | FDR q-val  | FWER p-val | RANK AT M/ | LEADING EDGE                          |
|------------|-----------------------|-------------|------|-----|------------|------------|------------|------------|------------|---------------------------------------|
| HALLMARK_I | HALLMARK_I            | Details ... |      | 199 | -0.4449561 | -7.273637  | 0          | 0          | 0          | 6214 tags=73%, list=29%, signal=103%  |
| HALLMARK_I | HALLMARK_I            | Details ... |      | 197 | -0.4322701 | -7.0123377 | 0          | 0          | 0          | 6207 tags=72%, list=29%, signal=101%  |
| HALLMARK_I | HALLMARK_I            | Details ... |      | 199 | -0.3728828 | -5.987838  | 0          | 0          | 0          | 4957 tags=60%, list=23%, signal=78%   |
| HALLMARK_I | HALLMARK_I            | Details ... |      | 197 | -0.3640439 | -5.9107423 | 0          | 0          | 0          | 6241 tags=65%, list=29%, signal=92%   |
| LCMVSLAMF  | LCMVSLAMF             | Details ... |      | 472 | -0.2359997 | -5.8742304 | 0          | 0          | 0          | 6207 tags=52%, list=29%, signal=72%   |
| HALLMARK_I | HALLMARK_I            | Details ... |      | 58  | -0.5186774 | -4.6220136 | 0          | 0          | 0          | 5121 tags=76%, list=24%, signal=100%  |
| HALLMARK_I | HALLMARK_I            | Details ... |      | 142 | -0.3185966 | -4.403866  | 0          | 0          | 0          | 5687 tags=58%, list=27%, signal=79%   |
| HALLMARK_I | HALLMARK_I            | Details ... |      | 197 | -0.2449287 | -4.1947365 | 0          | 0          | 0          | 6160 tags=53%, list=29%, signal=74%   |
| HALLMARK_I | HALLMARK_I            | Details ... |      | 195 | -0.2525059 | -4.101479  | 0          | 0          | 0          | 6225 tags=54%, list=29%, signal=76%   |
| HALLMARK_I | HALLMARK_I            | Details ... |      | 109 | -0.3058932 | -3.7452714 | 0          | 0          | 0          | 6390 tags=61%, list=30%, signal=86%   |
| HALLMARK_I | HALLMARK_I            | Details ... |      | 197 | -0.2232918 | -3.7423682 | 0          | 0          | 0          | 6184 tags=51%, list=29%, signal=72%   |
| HALLMARK_I | HALLMARK_I            | Details ... |      | 197 | -0.2134345 | -3.4836075 | 0          | 0          | 0          | 5099 tags=45%, list=24%, signal=59%   |
| HALLMARK_I | HALLMARK_I            | Details ... |      | 197 | -0.1924847 | -3.1713965 | 0          | 0          | 0          | 5970 tags=47%, list=28%, signal=65%   |
| HALLMARK_I | HALLMARK_I            | Details ... |      | 196 | -0.1827736 | -2.9884653 | 0          | 0          | 0          | 6225 tags=47%, list=29%, signal=67%   |
| HALLMARK_I | HALLMARK_I            | Details ... |      | 103 | -0.2436015 | -2.8566523 | 0          | 0          | 0          | 5774 tags=51%, list=27%, signal=70%   |
| HALLMARK_I | HALLMARK_I            | Details ... |      | 192 | -0.1757142 | -2.827452  | 0          | 0          | 0          | 5588 tags=44%, list=26%, signal=59%   |
| HALLMARK_I | HALLMARK_I            | Details ... |      | 189 | -0.1664107 | -2.639279  | 0          | 1.46E-04   | 0.002      | 14236 tags=84%, list=67%, signal=252% |
| HALLMARK_I | HALLMARK_I            | Details ... |      | 192 | -0.1622775 | -2.61299   | 0          | 2.15E-04   | 0.003      | 5539 tags=42%, list=26%, signal=57%   |
| HALLMARK_I | HALLMARK_I            | Details ... |      | 156 | -0.172276  | -2.50076   | 0          | 3.36E-04   | 0.005      | 6164 tags=46%, list=29%, signal=65%   |
| HALLMARK_I | HALLMARK_I            | Details ... |      | 95  | -0.2122903 | -2.459646  | 0.0020284  | 4.63E-04   | 0.007      | 6236 tags=51%, list=29%, signal=71%   |
| HALLMARK_I | HALLMARK_I            | Details ... |      | 150 | -0.1720723 | -2.4530694 | 0          | 4.41E-04   | 0.007      | 4579 tags=39%, list=22%, signal=49%   |
| HALLMARK_I | HALLMARK_I            | Details ... |      | 191 | -0.15044   | -2.4115067 | 0.00196078 | 6.33E-04   | 0.011      | 13720 tags=80%, list=65%, signal=223% |
| HALLMARK_I | HALLMARK_I            | Details ... |      | 194 | -0.1358403 | -2.212265  | 0          | 0.00232157 | 0.041      | 8299 tags=53%, list=39%, signal=86%   |
| HALLMARK_I | HALLMARK_I            | Details ... |      | 73  | -0.1888376 | -1.9089836 | 0.01207244 | 0.01406277 | 0.239      | 5889 tags=47%, list=28%, signal=64%   |
| HALLMARK_I | HALLMARK_I            | Details ... |      | 195 | -0.113581  | -1.8693652 | 0.00209205 | 0.01674648 | 0.288      | 8601 tags=52%, list=41%, signal=86%   |
| HALLMARK_I | HALLMARK_I            | Details ... |      | 194 | -0.1097662 | -1.7698954 | 0.02777778 | 0.02688386 | 0.425      | 5348 tags=36%, list=25%, signal=48%   |
| HALLMARK_I | HALLMARK_I            | Details ... |      | 101 | -0.1498345 | -1.7524316 | 0.02148438 | 0.02816335 | 0.456      | 6079 tags=44%, list=29%, signal=61%   |
| TILSLAMF6  | TILSLAMF6             | Details ... |      | 48  | -0.2099456 | -1.717786  | 0.01803607 | 0.03148249 | 0.51       | 6164 tags=50%, list=29%, signal=70%   |
| HALLMARK_I | HALLMARK_I            | Details ... |      | 196 | -0.1015687 | -1.6552683 | 0.03434343 | 0.04102198 | 0.622      | 14209 tags=77%, list=67%, signal=231% |
| HALLMARK_I | HALLMARK_I            | Details ... |      | 41  | -0.2194316 | -1.6230398 | 0.04684318 | 0.04695536 | 0.689      | 5703 tags=49%, list=27%, signal=67%   |
| HALLMARK_I | HALLMARK_ANGIOGENES   |             |      | 34  | -0.2065031 | -1.4399736 | 0.08764941 | 0.10130252 | 0.918      | 13097 tags=82%, list=62%, signal=215% |
| HALLMARK_I | HALLMARK_IL6_JAK_STAT |             |      | 85  | -0.1207603 | -1.3108134 | 0.16565657 | 0.16738662 | 0.987      | 2940 tags=26%, list=14%, signal=30%   |
| HALLMARK_I | HALLMARK_BILE_ACID_M  |             |      | 111 | -0.1000802 | -1.2451286 | 0.19438878 | 0.21290235 | 0.999      | 4769 tags=32%, list=22%, signal=42%   |
| HALLMARK_I | HALLMARK_COAGULATIO   |             |      | 134 | -0.0868446 | -1.1708057 | 0.25604838 | 0.26859653 | 0.999      | 14001 tags=75%, list=66%, signal=218% |
| HALLMARK_I | HALLMARK_HEDGEHOG_S   |             |      | 33  | -0.1320929 | -0.90126   | 0.5517928  | 0.5878818  | 1          | 8774 tags=55%, list=41%, signal=93%   |
| HALLMARK_I | HALLMARK_SPERMATOG    |             |      | 128 | -0.0591442 | -0.7758203 | 0.70841485 | 0.7485479  | 1          | 7206 tags=40%, list=34%, signal=60%   |

**Slamf6+ Control vs Ptpn2 KO Up**

| NAME       | GS<br> follo | GS DETAILS  | SIZE | ES  | NES        | NOM p-val | FDR q-val | FWER p-val | RANK AT M/ | LEADING EDGE                        |
|------------|--------------|-------------|------|-----|------------|-----------|-----------|------------|------------|-------------------------------------|
| LCMVSLAMF  | LCMVSLAMF    | Details ... |      | 387 | 0.29117668 | 6.5643954 | 0         | 0          | 0          | 5555 tags=55%, list=26%, signal=73% |
| TILSLAMF6  | TILSLAMF6    | Details ... |      | 50  | 0.49119323 | 3.932247  | 0         | 0          | 0          | 5301 tags=74%, list=25%, signal=98% |
| HALLMARK_I | HALLMARK_I   | Details ... |      | 197 | 0.23799965 | 3.8896594 | 0         | 0          | 0          | 5334 tags=49%, list=25%, signal=64% |
| LCMVSLAMF  | LCMVSLAMF    | Details ... |      | 50  | 0.4510987  | 3.732668  | 0         | 0          | 0          | 5301 tags=70%, list=25%, signal=93% |
| HALLMARK_I | HALLMARK_I   | Details ... |      | 91  | 0.32479033 | 3.6290736 | 0         | 0          | 0          | 5260 tags=57%, list=25%, signal=76% |
| HALLMARK_I | HALLMARK_I   | Details ... |      | 191 | 0.20853962 | 3.3997116 | 0         | 0          | 0          | 5166 tags=45%, list=24%, signal=59% |
| HALLMARK_I | HALLMARK_I   | Details ... |      | 159 | 0.206051   | 3.0031495 | 0         | 0          | 0          | 5533 tags=47%, list=26%, signal=62% |
| LCMVSLAMF  | LCMVSLAMF    | Details ... |      | 48  | 0.3270862  | 2.699819  | 0         | 2.28E-04   | 0.002      | 1031 tags=38%, list=5%, signal=39%  |
| HALLMARK_I | HALLMARK_I   | Details ... |      | 192 | 0.15612537 | 2.4886885 | 0         | 6.14E-04   | 0.006      | 4782 tags=38%, list=23%, signal=49% |

|                                   |     |            |           |            |            |       |       |                                 |
|-----------------------------------|-----|------------|-----------|------------|------------|-------|-------|---------------------------------|
| HALLMARK_ HALLMARK_ Details ...   | 194 | 0.14877301 | 2.391784  | 0          | 7.38E-04   | 0.008 | 2995  | tags=29%, list=14%, signal=33%  |
| HALLMARK_ HALLMARK_ Details ...   | 98  | 0.19934374 | 2.3389673 | 0          | 0.00101159 | 0.012 | 5530  | tags=46%, list=26%, signal=62%  |
| HALLMARK_ HALLMARK_ Details ...   | 188 | 0.14113162 | 2.2933862 | 0          | 0.00152773 | 0.02  | 5381  | tags=39%, list=25%, signal=52%  |
| TILSLAMF6_ TILSLAMF6_ Details ... | 47  | 0.24558964 | 1.9925895 | 0.00398406 | 0.00959874 | 0.133 | 3376  | tags=40%, list=16%, signal=48%  |
| HALLMARK_ HALLMARK_ Details ...   | 193 | 0.12121832 | 1.966011  | 0.0101833  | 0.0108211  | 0.157 | 2177  | tags=22%, list=10%, signal=25%  |
| HALLMARK_ HALLMARK_ Details ...   | 140 | 0.13374984 | 1.8324764 | 0.00798403 | 0.0229654  | 0.317 | 2332  | tags=24%, list=11%, signal=27%  |
| HALLMARK_ HALLMARK_ Details ...   | 32  | 0.27089778 | 1.807768  | 0.01840491 | 0.02463438 | 0.349 | 5530  | tags=53%, list=26%, signal=72%  |
| HALLMARK_ HALLMARK_ Details ...   | 198 | 0.10513117 | 1.7553878 | 0.02615694 | 0.02991927 | 0.432 | 8074  | tags=48%, list=38%, signal=78%  |
| HALLMARK_ HALLMARK_ Details ...   | 193 | 0.10835493 | 1.7434287 | 0.01659751 | 0.03030594 | 0.455 | 5085  | tags=35%, list=24%, signal=45%  |
| HALLMARK_ HALLMARK_ Details ...   | 185 | 0.10033242 | 1.5886017 | 0.03455285 | 0.05817046 | 0.718 | 4654  | tags=32%, list=22%, signal=41%  |
| HALLMARK_ HALLMARK_ Details ...   | 134 | 0.11359023 | 1.5852399 | 0.05241935 | 0.05619652 | 0.724 | 14542 | tags=80%, list=69%, signal=252% |
| HALLMARK_ HALLMARK_ Details ...   | 85  | 0.13901633 | 1.5034308 | 0.06734694 | 0.07968087 | 0.853 | 5297  | tags=39%, list=25%, signal=52%  |
| HALLMARK_ HALLMARK_ Details ...   | 43  | 0.16984719 | 1.2951231 | 0.14807302 | 0.18311948 | 0.991 | 14655 | tags=86%, list=69%, signal=278% |
| HALLMARK_ HALLMARK_ Details ...   | 53  | 0.13886358 | 1.1993146 | 0.24742268 | 0.24961221 | 0.998 | 1063  | tags=19%, list=5%, signal=20%   |
| HALLMARK_ HALLMARK_ Details ...   | 41  | 0.14251874 | 1.0787202 | 0.35420743 | 0.35988128 | 1     | 4742  | tags=37%, list=22%, signal=47%  |
| HALLMARK_ HALLMARK_ Details ...   | 111 | 0.08715428 | 1.0593446 | 0.39442232 | 0.3677921  | 1     | 8670  | tags=50%, list=41%, signal=83%  |

### Slamf6+ Control vs Ptpn2 KO Down

| NAME                            | GS<br> follow GS | DETAILS    | SIZE       | ES         | NES        | NOM p-val | FDR q-val | FWER p-val | RANK AT M/                      | LEADING EDGE                    |
|---------------------------------|------------------|------------|------------|------------|------------|-----------|-----------|------------|---------------------------------|---------------------------------|
| HALLMARK_ HALLMARK_ Details ... | 199              | -0.5475084 | -9.102268  | 0          | 0          | 0         | 0         | 0          | 5764                            | tags=81%, list=27%, signal=111% |
| HALLMARK_ HALLMARK_ Details ... | 195              | -0.507134  | -8.504279  | 0          | 0          | 0         | 0         | 0          | 5768                            | tags=77%, list=27%, signal=105% |
| HALLMARK_ HALLMARK_ Details ... | 197              | -0.4589235 | -7.626242  | 0          | 0          | 0         | 0         | 0          | 5754                            | tags=73%, list=27%, signal=99%  |
| HALLMARK_ HALLMARK_ Details ... | 197              | -0.4245645 | -6.7952003 | 0          | 0          | 0         | 0         | 0          | 5830                            | tags=70%, list=27%, signal=95%  |
| LCMVSLAMF LCMVSLAMF Details ... | 472              | -0.2651805 | -6.710572  | 0          | 0          | 0         | 0         | 0          | 5781                            | tags=53%, list=27%, signal=71%  |
| HALLMARK_ HALLMARK_ Details ... | 199              | -0.4184649 | -6.65191   | 0          | 0          | 0         | 0         | 0          | 5491                            | tags=67%, list=26%, signal=90%  |
| HALLMARK_ HALLMARK_ Details ... | 142              | -0.3972701 | -5.51877   | 0          | 0          | 0         | 0         | 0          | 5672                            | tags=66%, list=27%, signal=90%  |
| HALLMARK_ HALLMARK_ Details ... | 196              | -0.3169541 | -5.0484104 | 0          | 0          | 0         | 0         | 0          | 5569                            | tags=58%, list=26%, signal=77%  |
| HALLMARK_ HALLMARK_ Details ... | 58               | -0.5576897 | -5.0321164 | 0          | 0          | 0         | 0         | 0          | 4661                            | tags=78%, list=22%, signal=99%  |
| HALLMARK_ HALLMARK_ Details ... | 109              | -0.3097798 | -3.903723  | 0          | 0          | 0         | 0         | 0          | 5529                            | tags=57%, list=26%, signal=77%  |
| HALLMARK_ HALLMARK_ Details ... | 197              | -0.2370627 | -3.8048804 | 0          | 0          | 0         | 0         | 0          | 4602                            | tags=45%, list=22%, signal=57%  |
| HALLMARK_ HALLMARK_ Details ... | 198              | -0.2263479 | -3.6927087 | 0          | 0          | 0         | 0         | 0          | 5636                            | tags=49%, list=27%, signal=66%  |
| HALLMARK_ HALLMARK_ Details ... | 156              | -0.250604  | -3.677374  | 0          | 0          | 0         | 0         | 0          | 5466                            | tags=51%, list=26%, signal=68%  |
| HALLMARK_ HALLMARK_ Details ... | 197              | -0.2229464 | -3.6456904 | 0          | 0          | 0         | 0         | 0          | 5760                            | tags=49%, list=27%, signal=67%  |
| HALLMARK_ HALLMARK_ Details ... | 47               | -0.3909107 | -3.1711555 | 0          | 0          | 0         | 0         | 0          | 5718                            | tags=66%, list=27%, signal=90%  |
| HALLMARK_ HALLMARK_ Details ... | 103              | -0.2612404 | -3.084502  | 0          | 0          | 0         | 0         | 0          | 5813                            | tags=53%, list=27%, signal=73%  |
| HALLMARK_ HALLMARK_ Details ... | 150              | -0.2037814 | -2.925985  | 0          | 0          | 0         | 0         | 0          | 5042                            | tags=44%, list=24%, signal=57%  |
| HALLMARK_ HALLMARK_ Details ... | 101              | -0.2402414 | -2.806079  | 0          | 6.38E-05   | 0.001     | 0.001     | 5430       | tags=50%, list=26%, signal=66%  |                                 |
| HALLMARK_ HALLMARK_ Details ... | 189              | -0.1663319 | -2.6671908 | 0          | 6.04E-05   | 0.001     | 0.001     | 14573      | tags=85%, list=69%, signal=270% |                                 |
| HALLMARK_ HALLMARK_ Details ... | 95               | -0.235713  | -2.6244535 | 0          | 1.75E-04   | 0.003     | 0.003     | 5071       | tags=47%, list=24%, signal=62%  |                                 |
| HALLMARK_ HALLMARK_ Details ... | 194              | -0.1596546 | -2.530621  | 0          | 1.66E-04   | 0.003     | 0.003     | 4627       | tags=38%, list=22%, signal=48%  |                                 |
| HALLMARK_ HALLMARK_ Details ... | 193              | -0.1440488 | -2.2344508 | 0          | 0.00167544 | 0.032     | 0.032     | 5216       | tags=39%, list=25%, signal=51%  |                                 |
| HALLMARK_ HALLMARK_ Details ... | 191              | -0.1372958 | -2.208034  | 0          | 0.00175483 | 0.034     | 0.034     | 13995      | tags=80%, list=66%, signal=232% |                                 |
| HALLMARK_ HALLMARK_ Details ... | 194              | -0.1148173 | -1.8306313 | 0.02268431 | 0.01543393 | 0.275     | 0.275     | 4804       | tags=34%, list=23%, signal=44%  |                                 |
| HALLMARK_ HALLMARK_ Details ... | 196              | -0.1062101 | -1.7199013 | 0.02240326 | 0.02820627 | 0.471     | 0.471     | 14543      | tags=79%, list=69%, signal=249% |                                 |
| HALLMARK_ HALLMARK_ Details ... | 129              | -0.1184588 | -1.5543147 | 0.06300813 | 0.06335021 | 0.788     | 0.788     | 3423       | tags=28%, list=16%, signal=33%  |                                 |
| HALLMARK_ HALLMARK_ Details ... | 34               | -0.2188237 | -1.475996  | 0.0804829  | 0.08661995 | 0.884     | 0.884     | 12211      | tags=79%, list=58%, signal=187% |                                 |
| HALLMARK_ HALLMARK_ Details ... | 73               | -0.1401494 | -1.408378  | 0.09856263 | 0.11299629 | 0.958     | 0.958     | 4012       | tags=33%, list=19%, signal=40%  |                                 |
| HALLMARK_ HALLMARK_ Details ... | 195              | -0.0852535 | -1.3531938 | 0.13692947 | 0.13660948 | 0.977     | 0.977     | 4627       | tags=30%, list=22%, signal=38%  |                                 |
| HALLMARK_ HALLMARK_ Details ... | 34               | -0.1674472 | -1.1596053 | 0.28663793 | 0.27665764 | 1         | 1         | 13299      | tags=79%, list=63%, signal=213% |                                 |
| HALLMARK_ HALLMARK_HEDGEHOG_S   | 33               | -0.137909  | -0.923003  | 0.52238804 | 0.5375027  | 1         | 1         | 8650       | tags=55%, list=41%, signal=92%  |                                 |
